# Supplementary material
Source: HighWire-hosted journal article supplement (https://www.annfammed.org/content/suppl/2018/11/08/16.6.552)
Supplement: Hudson_Supp_Apps.pdf [file Hudson_Supp_Apps.pdf]

**Supplemental materials for:**

Hudson AJ, Benjamin J, Jardeleza T, et al. Clinical interpretation of peripheral pulse oximeters labeled "not for medical use". *Ann Fam Med*. 2018;16(6):552-554.

**Supplemental Table 1.** “Sports and Aviation” or “Wellness” pulse oximeters

| Distributor/Manufacturer | Model                                         |
|--------------------------|-----------------------------------------------|
| Drive Medical            | Fingertip Pulse Oximeter                      |
| Devon Medical Products   | PC-60C Fingertip Pulse Oximeter               |
| Contec Medical Systems   | CMS 50DL Fingertip Pulse Oximeter             |
| Santa Medical            | SM-2400 OLED Fingertip Pulse Oximeter         |
| Nonin Medical            | Go2 Achieve Personal Fingertip Pulse Oximeter |
| Quest Products           | 3-in-1 Fingertip Pulse Oximeter               |
| ChoiceMMed               | MD300C52 Fingertip Pulse Oximeter             |
| Octive Technologies USA  | 300C Fingertip Pulse Oximeter                 |

**Supplemental Figure 1. Modified Bland Altman Analysis comparing 8 NMU-PO to MU-PO.**

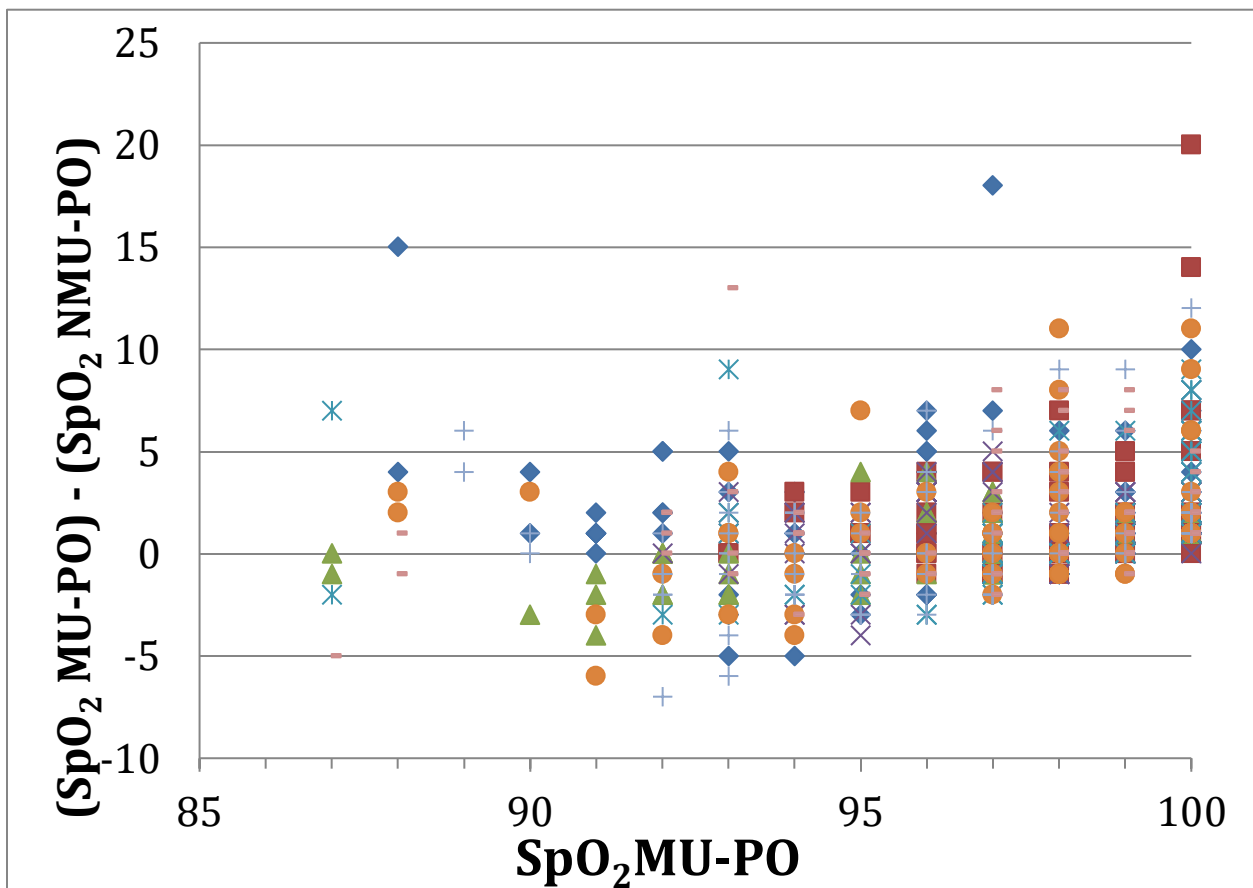

MU-PO = medical use pulse oximeters; NMU-PO = nonmedical use pulse oximeters; SpO<sub>2</sub> = oxygen saturation.
